# Supplementary material
Source: PubMed Central journal article supplement (PMC10191673)
Supplement: boe-14-5-2375-s001.pdf [file boe-14-5-2375-s001.pdf]

## Two-dimensional peripheral refraction in adults: supplement

XIAOYUN XI,<sup>1</sup>  JIANGDONG HAO,<sup>1</sup> ZHENGHUA LIN,<sup>2</sup>  SIDI WANG,<sup>1,3</sup>  ZHIKUAN YANG,<sup>1,4</sup> WEIZHONG LAN,<sup>1,4,5</sup>  AND PABLO ARTAL<sup>1,6,\*</sup> 

<sup>1</sup>Aier School of Ophthalmology, Central South University, Changsha, China

<sup>2</sup>Aier Institute of Optometry and Vision Science, Aier Eye Hospital Group, Changsha, China

<sup>3</sup>Shaanxi Eye Hospital, Xi'an People's Hospital (Xi'an Fourth Hospital), China

<sup>4</sup>School of Stomatology and Ophthalmology, Xianning Medical College, Hubei University of Science and Technology, China

<sup>5</sup>Guangzhou Aier Eye Hospital, Guangzhou, China

<sup>6</sup>Laboratorio de Óptica, Universidad de Murcia, Campus de Espinardo, Murcia, Spain

\*[pablo@um.es](mailto:pablo@um.es)

---

This supplement published with Optica Publishing Group on 28 April 2023 by The Authors under the terms of the [Creative Commons Attribution 4.0 License](https://creativecommons.org/licenses/by/4.0/) in the format provided by the authors and unedited. Further distribution of this work must maintain attribution to the author(s) and the published article's title, journal citation, and DOI.

Supplement DOI: <https://doi.org/10.6084/m9.figshare.22656376>

Parent Article DOI: <https://doi.org/10.1364/BOE.488098>

## Supplementary materials

**Table 1 Comparisons of Averaged RPR between peripheral zones and MZ2 in G1(n=6)**

|     | Mean    | SD      | Dif M    | Dif SD  | Dif 95% CI |          | t       | P     |
|-----|---------|---------|----------|---------|------------|----------|---------|-------|
|     |         |         |          |         | Lower      | Upper    |         |       |
|     |         |         |          |         | limit      | limit    |         |       |
| UZ1 | -1.0017 | 0.44991 | -0.99000 | 0.33100 | -1.33736   | -0.64264 | -7.326  | 0.001 |
| UZ2 | -0.4033 | 0.98358 | -0.39167 | 0.82858 | -1.26120   | 0.47787  | -1.158  | 0.299 |
| UZ3 | -0.3517 | 0.84253 | -0.34000 | 0.75797 | -1.13544   | 0.45544  | -1.099  | 0.322 |
| MZ1 | -0.7183 | 0.16192 | -0.70667 | 0.14692 | -0.86085   | -0.55248 | -11.781 | 0.000 |
| MZ2 | -0.0117 | 0.17383 | –        | –       | –          | –        | –       | –     |
| MZ3 | -0.4017 | 0.67585 | -0.39000 | 0.62469 | -1.04557   | 0.26557  | -1.529  | 0.187 |
| LZ1 | -0.8433 | 0.75320 | -0.83167 | 0.71990 | -1.58716   | -0.07618 | -2.830  | 0.037 |
| LZ2 | -0.5667 | 0.33980 | -0.55500 | 0.35987 | -0.93267   | -0.17733 | -3.778  | 0.013 |
| LZ3 | -1.1550 | 0.87548 | -1.14333 | 0.88518 | -2.07227   | -0.21439 | -3.164  | 0.025 |

**Table 2 Comparisons of Averaged RPR between peripheral zones and MZ2 in G2(n=26)**

|     | Mean    | SD      | Dif M    | Dif SD  | Dif 95% CI |          | t      | P     |
|-----|---------|---------|----------|---------|------------|----------|--------|-------|
|     |         |         |          |         | Lower      | Upper    |        |       |
|     |         |         |          |         | limit      | limit    |        |       |
| UZ1 | -0.6762 | 0.65394 | -0.64577 | 0.59582 | -0.88643   | -0.40511 | -5.526 | 0.000 |
| UZ2 | -0.4135 | 0.42107 | -0.38308 | 0.35636 | -0.52701   | -0.23914 | -5.481 | 0.000 |
| UZ3 | -0.4431 | 0.63957 | -0.41269 | 0.57838 | -0.64631   | -0.17908 | -3.638 | 0.001 |
| MZ1 | -0.4850 | 0.38913 | -0.45462 | 0.35004 | -0.59600   | -0.31323 | -6.622 | 0.000 |
| MZ2 | -0.0304 | 0.11152 | –        | –       | –          | –        | –      | –     |
| MZ3 | -0.3188 | 0.53598 | -0.28846 | 0.47386 | -0.47986   | -0.09707 | -3.104 | 0.005 |
| LZ1 | -0.5088 | 0.50562 | -0.47846 | 0.45750 | -0.66325   | -0.29367 | -5.333 | 0.000 |
| LZ2 | -0.2827 | 0.32435 | -0.25231 | 0.26961 | -0.36121   | -0.14341 | -4.772 | 0.000 |
| LZ3 | -0.6288 | 0.59616 | -0.59846 | 0.53291 | -0.81371   | -0.38321 | -5.726 | 0.000 |

**Table 3 Comparisons of Averaged RPR between peripheral zones and MZ2 in G3(n=83)**

|     | Mean    | SD      | Dif M    | Dif SD  | Dif 95% CI |          | t      | P     |
|-----|---------|---------|----------|---------|------------|----------|--------|-------|
|     |         |         |          |         | Lower      | Upper    |        |       |
|     |         |         |          |         | limit      | limit    |        |       |
| UZ1 | -0.0831 | 0.77624 | -0.16819 | 0.71396 | -0.32409   | -0.01229 | -2.146 | 0.035 |
| UZ2 | -0.1292 | 0.42058 | -0.21422 | 0.37116 | -0.29526   | -0.13317 | -5.258 | 0.000 |
| UZ3 | 0.2292  | 0.66267 | 0.14410  | 0.68203 | -0.00483   | 0.29302  | 1.925  | 0.058 |
| MZ1 | 0.0677  | 0.58102 | -0.01735 | 0.50594 | -0.12782   | 0.09313  | -0.312 | 0.756 |
| MZ2 | 0.0851  | 0.20516 | –        | –       | –          | –        | –      | –     |
| MZ3 | 0.3430  | 0.63315 | 0.25795  | 0.64329 | 0.11749    | 0.39842  | 3.653  | 0.000 |
| LZ1 | 0.2307  | 0.66906 | 0.14566  | 0.61159 | 0.01212    | 0.27921  | 2.170  | 0.033 |
| LZ2 | 0.0349  | 0.40812 | -0.05012 | 0.34857 | -0.12623   | 0.02599  | -1.310 | 0.194 |
| LZ3 | 0.0528  | 0.61897 | -0.03229 | 0.62194 | -0.16809   | 0.10352  | -0.473 | 0.637 |

**Table 4 Comparisons of Averaged RPR between peripheral zones and MZ2 in G4(n=81)**

|     | Mean   | SD      | Dif M    | Dif SD  | Dif 95% CI |          | t      | P     |
|-----|--------|---------|----------|---------|------------|----------|--------|-------|
|     |        |         |          |         | Lower      | Upper    |        |       |
|     |        |         |          |         | limit      | limit    |        |       |
| UZ1 | 0.7383 | 0.85097 | 0.56716  | 0.81368 | 0.38724    | 0.74708  | 6.273  | 0.000 |
| UZ2 | 0.2120 | 0.65785 | 0.04086  | 0.60927 | -0.09386   | 0.17558  | 0.604  | 0.548 |
| UZ3 | 1.1037 | 0.87426 | 0.93259  | 0.83710 | 0.74750    | 1.11769  | 10.027 | 0.000 |
| MZ1 | 0.7011 | 0.62996 | 0.53000  | 0.59922 | 0.39750    | 0.66250  | 7.960  | 0.000 |
| MZ2 | 0.1711 | 0.17515 | -        | -       | -          | -        | -      | -     |
| MZ3 | 1.1015 | 0.74206 | 0.93037  | 0.68651 | 0.77857    | 1.08217  | 12.197 | 0.000 |
| LZ1 | 0.8827 | 0.71384 | 0.71160  | 0.66003 | 0.56566    | 0.85755  | 9.703  | 0.000 |
| LZ2 | 0.0670 | 0.51401 | -0.10407 | 0.42537 | -0.19813   | -0.01002 | -2.202 | 0.031 |
| LZ3 | 0.6528 | 0.83133 | 0.48173  | 0.75574 | 0.31462    | 0.64884  | 5.737  | 0.000 |

**Table 5 Comparisons of Averaged RPR between peripheral zones and MZ2 in G5(n=97)**

|     | Mean   | SD      | Dif M    | Dif SD  | Dif 95% CI |          | t      | P     |
|-----|--------|---------|----------|---------|------------|----------|--------|-------|
|     |        |         |          |         | Lower      | Upper    |        |       |
|     |        |         |          |         | limit      | limit    |        |       |
| UZ1 | 1.3877 | 1.02269 | 1.13969  | 1.00060 | 0.93803    | 1.34136  | 11.218 | 0.000 |
| UZ2 | 0.5187 | 0.70793 | 0.27062  | 0.67199 | 0.13518    | 0.40605  | 3.966  | 0.000 |
| UZ3 | 1.8101 | 1.03698 | 1.56206  | 1.00614 | 1.35928    | 1.76484  | 15.291 | 0.000 |
| MZ1 | 1.1803 | 0.77807 | 0.93227  | 0.74672 | 0.78177    | 1.08277  | 12.296 | 0.000 |
| MZ2 | 0.2480 | 0.20757 | -        | -       | -          | -        | -      | -     |
| MZ3 | 1.5716 | 0.92753 | 1.32361  | 0.89040 | 1.14415    | 1.50306  | 14.641 | 0.000 |
| LZ1 | 1.4001 | 0.98626 | 1.15206  | 0.94655 | 0.96129    | 1.34283  | 11.987 | 0.000 |
| LZ2 | 0.0631 | 0.50349 | -0.18495 | 0.43155 | -0.27193   | -0.09797 | -4.221 | 0.000 |
| LZ3 | 0.8674 | 0.95309 | 0.61938  | 0.91858 | 0.43425    | 0.80452  | 6.641  | 0.000 |

**Table 6 Comparisons of Averaged RPR between peripheral zones and MZ2 in G6(n=186)**

|     | Mean   | SD      | Dif M    | Dif SD  | Dif 95% CI |         | t      | P     |
|-----|--------|---------|----------|---------|------------|---------|--------|-------|
|     |        |         |          |         | Lower      | Upper   |        |       |
|     |        |         |          |         | limit      | limit   |        |       |
| UZ1 | 1.6089 | 1.21404 | 1.40495  | 1.17077 | 1.23559    | 1.57431 | 16.366 | 0.000 |
| UZ2 | 0.6503 | 0.72855 | 0.44634  | 0.66699 | 0.34986    | 0.54283 | 9.127  | 0.000 |
| UZ3 | 2.0348 | 1.21158 | 1.83091  | 1.16444 | 1.66247    | 1.99936 | 21.444 | 0.000 |
| MZ1 | 1.2923 | 0.91815 | 1.08833  | 0.86099 | 0.96378    | 1.21288 | 17.239 | 0.000 |
| MZ2 | 0.2039 | 0.21733 | -        | -       | -          | -       | -      | -     |
| MZ3 | 1.7232 | 1.06534 | 1.51930  | 1.01668 | 1.37223    | 1.66637 | 20.381 | 0.000 |
| LZ1 | 1.5222 | 1.05248 | 1.31828  | 0.99924 | 1.17373    | 1.46283 | 17.993 | 0.000 |
| LZ2 | 0.1872 | 0.47809 | -0.01677 | 0.41242 | -0.07643   | 0.04288 | -0.555 | 0.580 |

|     |        |         |         |         |         |         |        |       |
|-----|--------|---------|---------|---------|---------|---------|--------|-------|
| LZ3 | 1.1899 | 1.03358 | 0.98602 | 0.98728 | 0.84320 | 1.12884 | 13.621 | 0.000 |
|-----|--------|---------|---------|---------|---------|---------|--------|-------|

SD=standard deviation

Dif M= difference of M<sub>(peripheral zone-MZ2)</sub>, Dif SD= difference of SD<sub>(peripheral zone-MZ2)</sub>

**Table 7 ANOVA analysis of 4 annular regions in each group**

| Group        | Zone | Mean    | SD      | 95% Confidence Interval |             | F      | P     | linear F | linear P |
|--------------|------|---------|---------|-------------------------|-------------|--------|-------|----------|----------|
|              |      |         |         | for Mean                |             |        |       |          |          |
|              |      |         |         | Lower Bound             | Upper Bound |        |       |          |          |
| (0.5,5] D    | CAR1 | 0.0317  | 0.05492 | -0.026                  | 0.0893      | 2.514  | 0.088 | 6.806    | 0.017    |
|              | CAR2 | 0.015   | 0.19947 | -0.1943                 | 0.2243      |        |       |          |          |
|              | CAR3 | -0.17   | 0.36775 | -0.5559                 | 0.2159      |        |       |          |          |
|              | CAR4 | -0.3933 | 0.44473 | -0.8601                 | 0.0734      |        |       |          |          |
| (-0.5,0.5] D | CAR1 | 0.0054  | 0.06015 | -0.0189                 | 0.0297      | 17.682 | 0     | 48.958   | 0        |
|              | CAR2 | -0.025  | 0.11745 | -0.0724                 | 0.0224      |        |       |          |          |
|              | CAR3 | -0.1465 | 0.18284 | -0.2204                 | -0.0727     |        |       |          |          |
|              | CAR4 | -0.3158 | 0.27238 | -0.4258                 | -0.2058     |        |       |          |          |
| (-2, -0.5] D | CAR1 | 0.0466  | 0.14274 | -0.0155                 | 0.0778      | 1.412  | 0.239 | 1.004    | 0.317    |
|              | CAR2 | 0.0912  | 0.21551 | -0.0441                 | 0.1383      |        |       |          |          |
|              | CAR3 | 0.0624  | 0.25177 | -0.0074                 | 0.1174      |        |       |          |          |
|              | CAR4 | 0.0176  | 0.30318 | -0.0486                 | 0.0838      |        |       |          |          |
| (-4, -2] D   | CAR1 | 0.071   | 0.11839 | -0.0448                 | 0.0972      | 7.608  | 0     | 22.173   | 0        |
|              | CAR2 | 0.1512  | 0.19491 | -0.1081                 | 0.1943      |        |       |          |          |
|              | CAR3 | 0.1796  | 0.26161 | -0.1218                 | 0.2375      |        |       |          |          |
|              | CAR4 | 0.2552  | 0.35521 | -0.1766                 | 0.3337      |        |       |          |          |
| (-6, -4] D   | CAR1 | 0.1072  | 0.15301 | -0.0764                 | 0.1381      | 21.53  | 0     | 63.962   | 0        |
|              | CAR2 | 0.2162  | 0.2374  | -0.1683                 | 0.264       |        |       |          |          |
|              | CAR3 | 0.2935  | 0.285   | -0.2361                 | 0.3509      |        |       |          |          |
|              | CAR4 | 0.4265  | 0.40498 | -0.3449                 | 0.5081      |        |       |          |          |
| (-12, -6] D  | CAR1 | 0.0625  | 0.15274 | -0.0404                 | 0.0846      | 81.272 | 0     | 239.258  | 0        |
|              | CAR2 | 0.1775  | 0.24585 | -0.142                  | 0.2131      |        |       |          |          |
|              | CAR3 | 0.3114  | 0.30269 | -0.2676                 | 0.3552      |        |       |          |          |
|              | CAR4 | 0.5156  | 0.41387 | -0.4558                 | 0.5755      |        |       |          |          |

**Table 8 ANOVA linear terms of 4 annular regions between 6 groups**

| group | ANOVA  |       | ANOVA linear term |       |
|-------|--------|-------|-------------------|-------|
|       | F      | P     | F                 | P     |
| CAR1  | 3.025  | 0.011 | 2.460             | 0.117 |
| CAR2  | 6.920  | 0.000 | 10.547            | 0.001 |
| CAR3  | 22.136 | 0.000 | 39.728            | 0.000 |
| CAR4  | 41.335 | 0.000 | 71.826            | 0.000 |

**Table 9 ANOVA analysis of four axisymmetric regions DAI in groups**

| group         | axisymmetric zone | Mean     | SD      | 95% Confidence    |        |         |         |
|---------------|-------------------|----------|---------|-------------------|--------|---------|---------|
|               |                   |          |         | Interval for Mean |        | Minimum | Maximum |
|               |                   |          |         | Lower             | Upper  |         |         |
|               |                   |          |         | Bound             | Bound  |         |         |
| (-0.5, 0.5] D | Up-down           | 0.287    | 0.1946  | 0.2084            | 0.3656 | 0.1     | 1       |
|               | S-I               | 0.3522   | 0.29127 | 0.2346            | 0.4699 | 0.09    | 1.52    |
|               | Tu-Td             | 0.2164   | 0.13241 | 0.1629            | 0.2698 | 0.07    | 0.57    |
|               | Nu-Nd             | 0.2168   | 0.11815 | 0.1691            | 0.2646 | 0.06    | 0.47    |
| (-2, -0.5] D  | Up-down           | 0.3167   | 0.19498 | 0.2742            | 0.3593 | 0.07    | 1.03    |
|               | S-I               | 0.4044   | 0.2774  | 0.3438            | 0.4649 | 0.06    | 1.39    |
|               | Tu-Td             | 0.2257   | 0.16323 | 0.1901            | 0.2614 | 0.03    | 1       |
|               | Nu-Nd             | 0.2175   | 0.11657 | 0.1921            | 0.243  | 0.05    | 0.64    |
| (-4, -2] D    | Up-down           | 0.445    | 0.37665 | 0.3617            | 0.5283 | 0.08    | 2.2     |
|               | S-I               | 0.575    | 0.53101 | 0.4576            | 0.6925 | 0.07    | 3.04    |
|               | Tu-Td             | 0.2843   | 0.22614 | 0.2343            | 0.3343 | 0.05    | 1.01    |
|               | Nu-Nd             | 0.3261   | 0.25837 | 0.269             | 0.3833 | 0.05    | 1.66    |
| (-6, -4] D    | Up-down           | 0.5129   | 0.30564 | 0.4513            | 0.5745 | 0.16    | 1.64    |
|               | S-I               | 0.6462   | 0.44296 | 0.557             | 0.7355 | 0.13    | 2.1     |
|               | Tu-Td             | 0.3166   | 0.19316 | 0.2776            | 0.3555 | 0.06    | 1.21    |
|               | Nu-Nd             | 0.424    | 0.27257 | 0.369             | 0.4789 | 0.08    | 1.4     |
| (-12, -6] D   | Up-down           | 0.526    | 0.35715 | 0.4744            | 0.5777 | 0.08    | 2.28    |
|               | S-I               | 0.6554   | 0.49023 | 0.5845            | 0.7263 | 0.08    | 3.06    |
|               | Tu-Td             | 0.3366   | 0.22522 | 0.304             | 0.3692 | 0.05    | 1.69    |
|               | Nu-Nd             | 0.4373   | 0.32173 | 0.3907            | 0.4838 | 0.05    | 1.81    |
| ANOVA         | Up-down           | F=8.731  | P=0.000 |                   |        |         |         |
|               | S-I               | F=6.709  | P=0.000 |                   |        |         |         |
|               | Tu-Td             | F=5.527  | P=0.000 |                   |        |         |         |
|               | Nu-Nd             | F=13.448 | P=0.000 |                   |        |         |         |

**Table 10 Paired t-test between axisymmetric and centrosymmetric DAI in S-I**

| group          | Axisymmetric DAI |         | Centrosymmetric DAI |         | dif M   | dif SD  | 95% Confidence Interval |         | t      | p     |
|----------------|------------------|---------|---------------------|---------|---------|---------|-------------------------|---------|--------|-------|
|                |                  |         |                     |         |         |         | of the Difference       |         |        |       |
|                | Mean             | SD      | Mean                | SD      |         |         | Lower                   | Upper   |        |       |
| (-0.5,0.5] D   | 0.3527           | 0.29164 | 0.3700              | 0.28778 | 0.01731 | 0.02662 | 0.02806                 | 0.00656 | -3.316 | 0.003 |
| (-2, -0.5] D   | 0.4043           | 0.27705 | 0.4458              | 0.27730 | 0.04145 | 0.08297 | 0.05956                 | 0.02333 | -4.551 | 0.000 |
| (-4, -2] D     | 0.5752           | 0.53129 | 0.6178              | 0.52020 | 0.04259 | 0.08063 | 0.06042                 | 0.02476 | -4.754 | 0.000 |
| (-6, -4] D     | 0.6469           | 0.44296 | 0.7007              | 0.45115 | 0.05381 | 0.16949 | 0.08797                 | 0.01966 | -3.127 | 0.002 |
| (-12, -6] D    | 0.6558           | 0.49030 | 0.6927              | 0.47918 | 0.03694 | 0.08791 | 0.04965                 | 0.02422 | -5.730 | 0.000 |
| ANOVA linear F | 18.078           |         | 20.846              |         |         |         |                         |         |        |       |
| ANOVA linear P | 0.000            |         | 0.000               |         |         |         |                         |         |        |       |

Dif M= difference of M (Axisymmetric DAI -Centrosymmetric DAI), Dif SD= difference of SD (Axisymmetric DAI - Centrosymmetric DAI)

Two-dimensional peripheral maps of astigmatism and coma ( $J_0$ ,  $J_{45}$ , and COMA-T, COMA-S) for each central refractive group.

## 1.J0

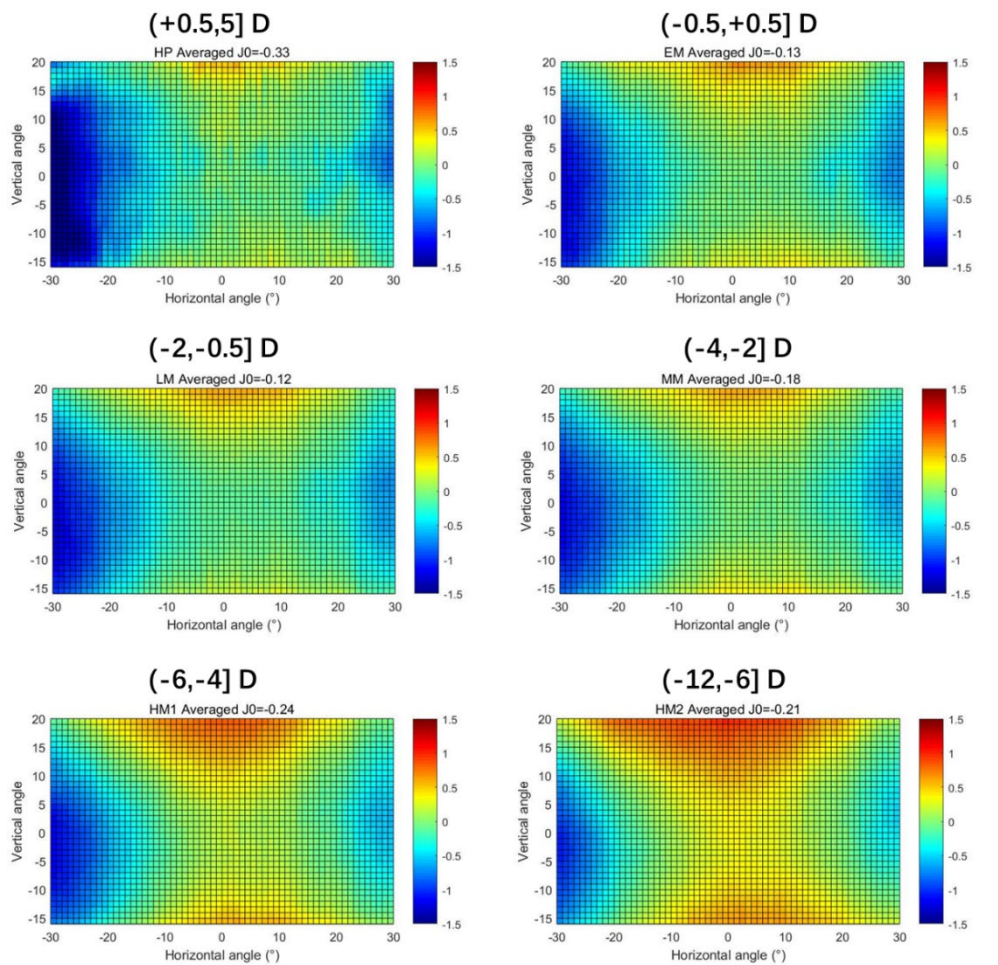

**Figure 1.** Distribution of  $J_0$  in different groups, the color bar gives the diopter range from -1.5 to 1.5 D for each map.

We can see that **1)**  $J_0$  is negative in the horizontal meridian and positive in the vertical direction, and **2)** with the progress of central myopia, the value horizontal meridian and vertical direction all increases gradually, in other words, more positive, **3)** as the eccentricity increases, the absolute value increases, too, **4)** especially,  $J_0$  in temporal retina is more negative than nasal retina and values in superior retina is more positive than inferior retina.

## 2.J45

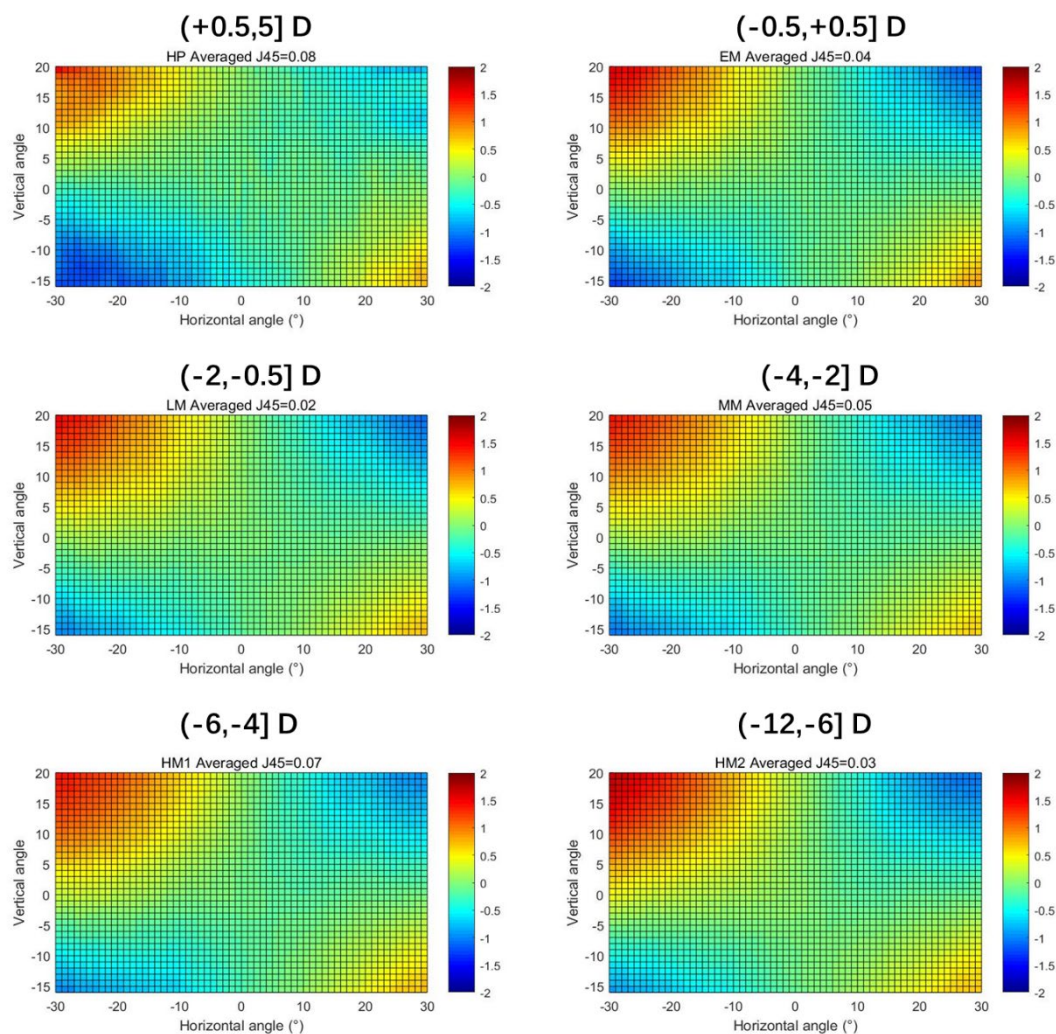

**Figure 2.** Distribution of J45 in different groups, the color bar gives the diopter range from -2 to 2 D for each map.

From figure 2, We find that **1)** J45 with axes at  $45^\circ$  (from inferior temporal to superior nasal retina) is negative and positive with axes at  $135^\circ$  (from inferior nasal to superior temporal retina), and **2)** with the progress of central myopia, the absolute value increases with axes  $135^\circ$  gradually, **3)** as the eccentricity increases, the absolute value increases, too, **4)** especially, J45 in superior temporal retina is more positive than inferior nasal retina with axes  $135^\circ$ , while values in axes  $45^\circ$  seems no such pattern, values in inferior temporal is more negative than superior nasal retina in group (0.5,5)D, and almost similar in group (-0.5,+0.5)D, and last, in myopia groups, values in superior nasal retina is more negative than inferior temporal retina.



### 3. Tangential COMA(COMA-T)

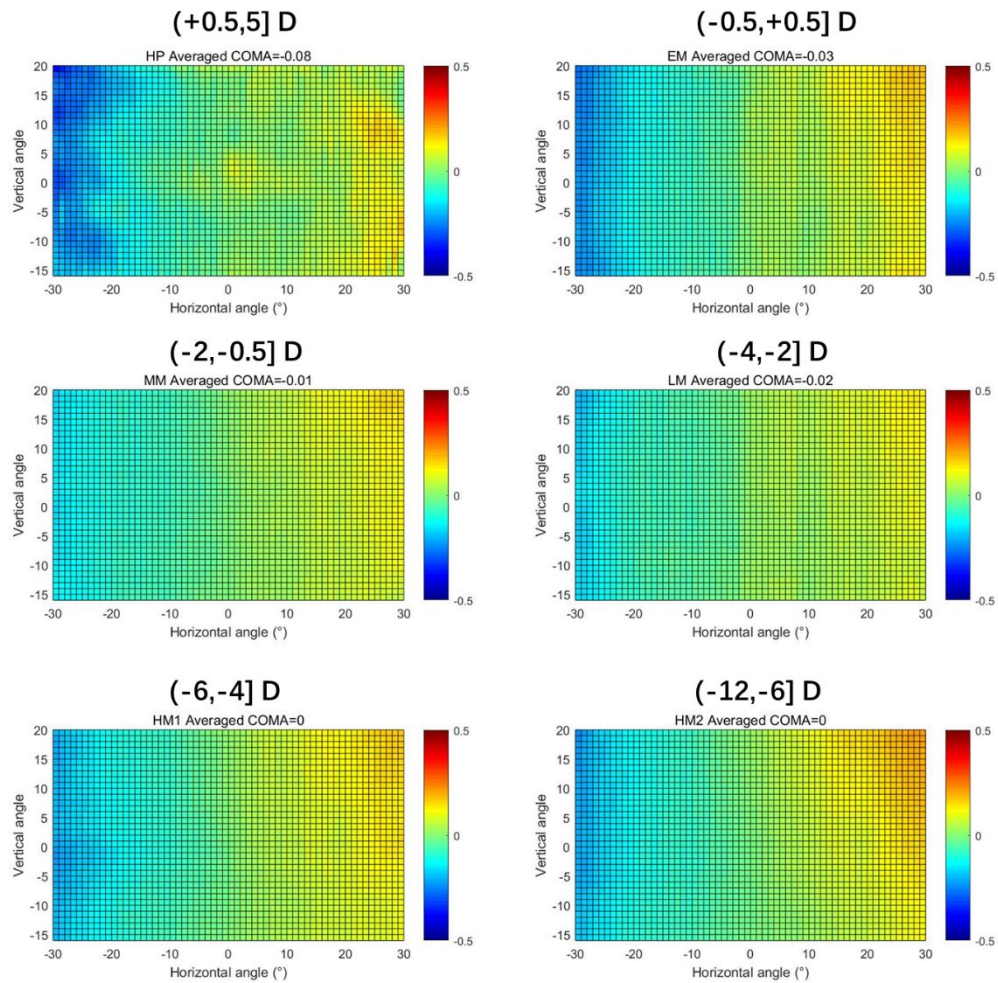

**Figure 3.** showed the distribution of COMA-T in different groups, the color bar gives the scale range from -0.5 to 0.5  $\mu\text{m}$  for each map.

We can see that 1) COMA-T is negative in temporal retina but positive in nasal retina, and almost zero in central vertical meridian, 2) with the progress of central myopia, the value in temporal retina represents more negative and more positive in nasal retina, 3) as the eccentricity increases, the absolute value increases in both temporal and nasal retina.



## 4.Sagittal COMA(COMA-S)

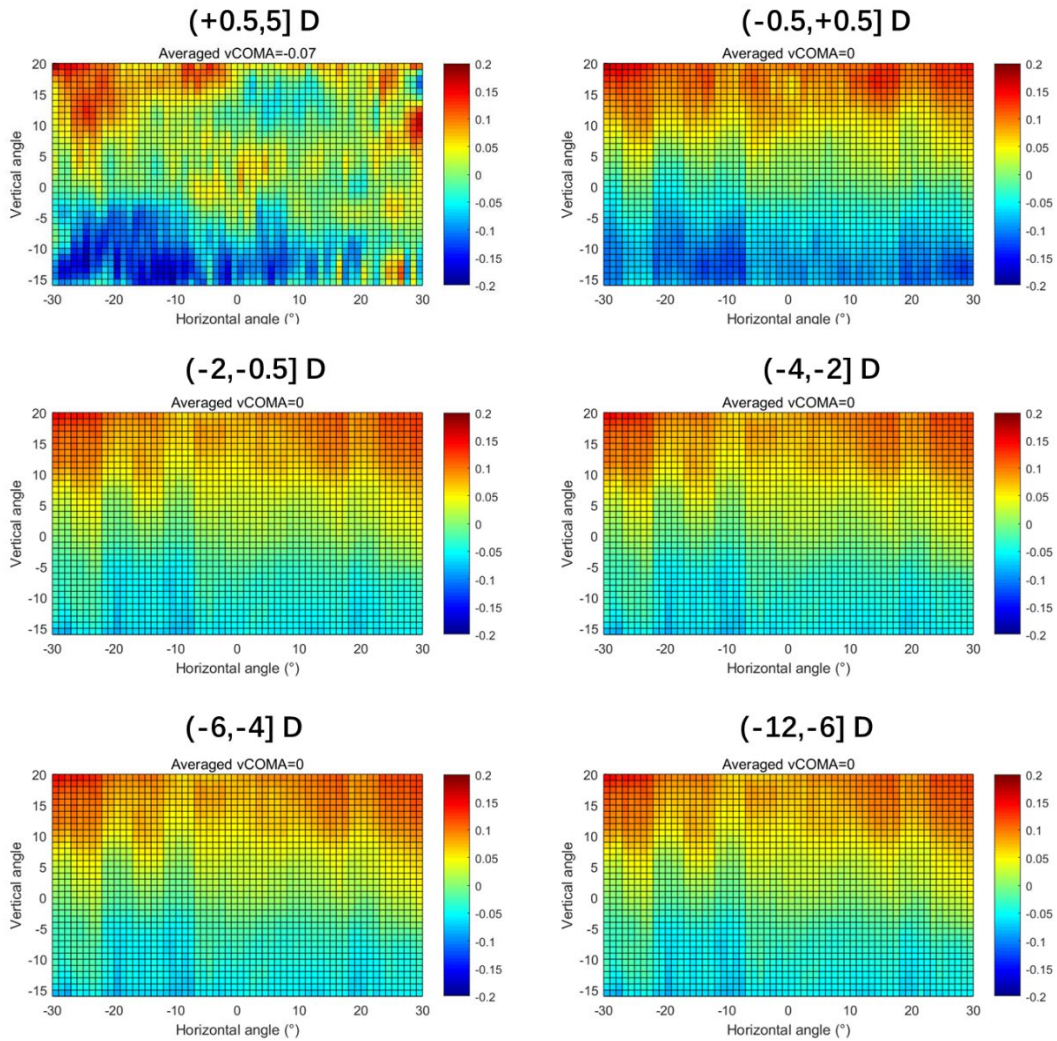

Figure 4. Distribution of COMA-S in different groups, the color bar gives the scale range from -0.2 to 0.2  $\mu\text{m}$  for each map.

We can see that 1) COMA-S is negative in inferior retina but positive in superior retina, and almost zero in horizontal meridian, 2) with the progress of central myopia, the values change not obviously in superior retina, while for inferior retina, it is more negative in hyperopic and emmetropic groups than myopic groups.
